# Supplementary material
Source: Springer Nature journal article supplement (https://www.springermedizin.de/resource/supplementary/13014_2013_1250_MOESM4_ESM.pdf/9634624)

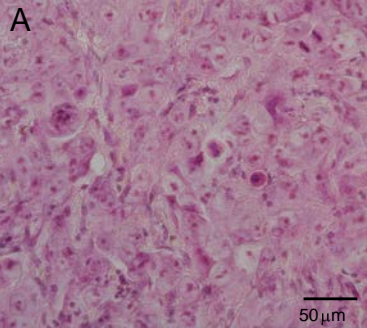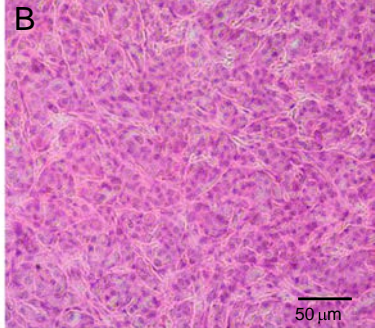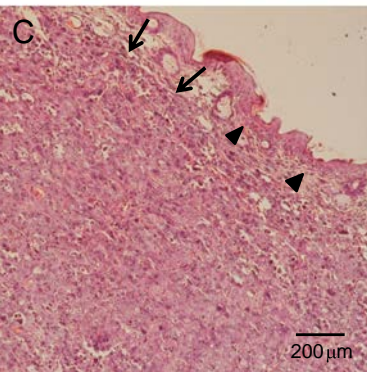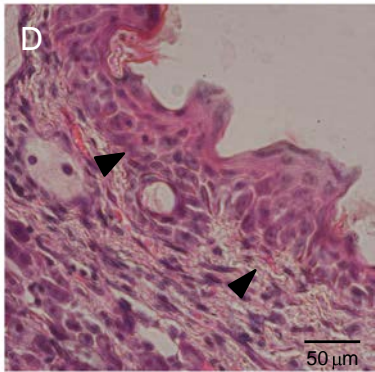

Supplement: MOESM4 [file 9634624]
